# Supplementary material
Source: PubMed Central journal article supplement (PMC8812511)

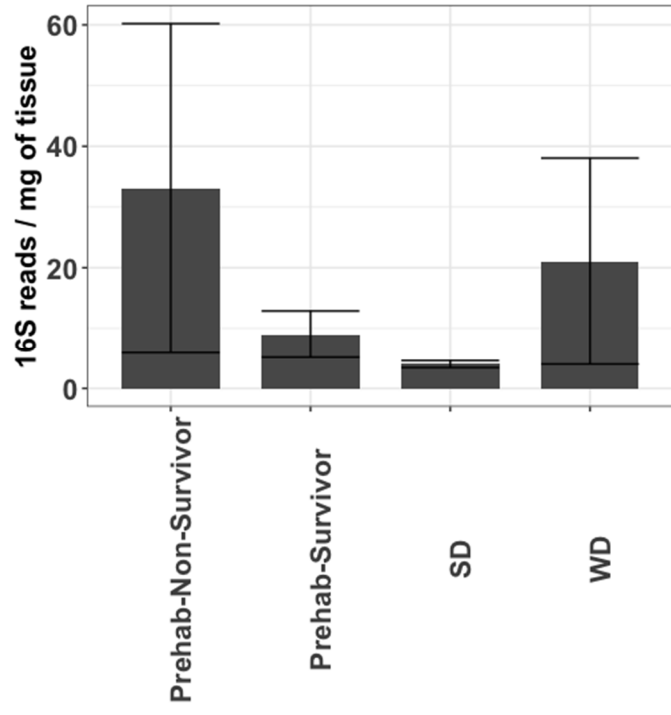

Supplement: NIHMS1770970-supplement-FigS1.pdf [file NIHMS1770970-supplement-FigS1.pdf]

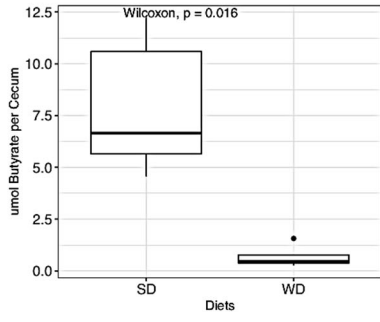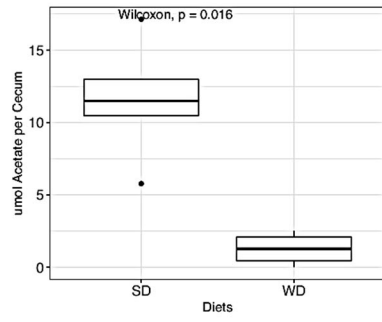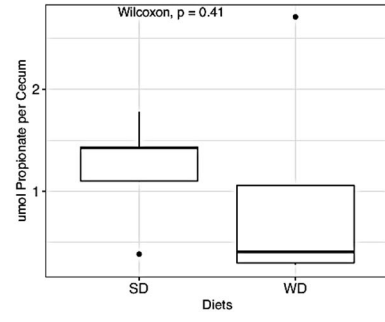

Supplement: NIHMS1770970-supplement-FigS2.pdf [file NIHMS1770970-supplement-FigS2.pdf]

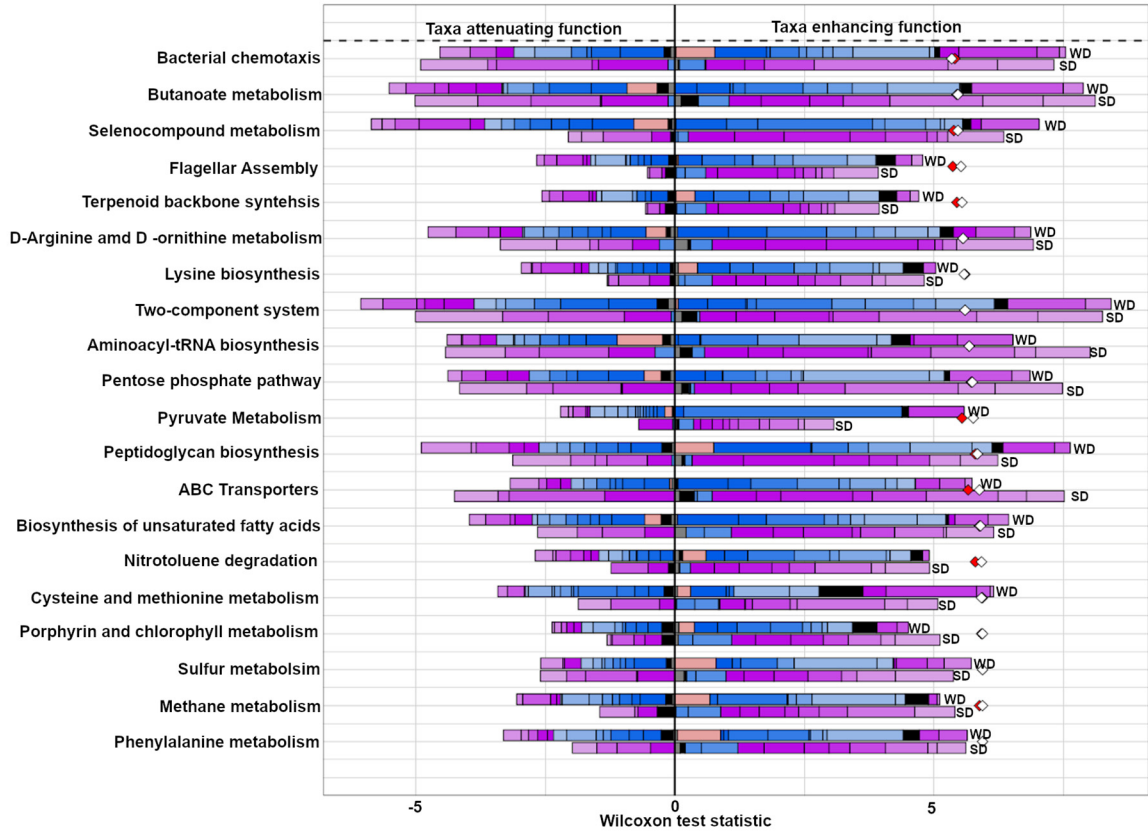

Supplement: NIHMS1770970-supplement-FigS3.pdf [file NIHMS1770970-supplement-FigS3.pdf]

### Butyrate Pathways

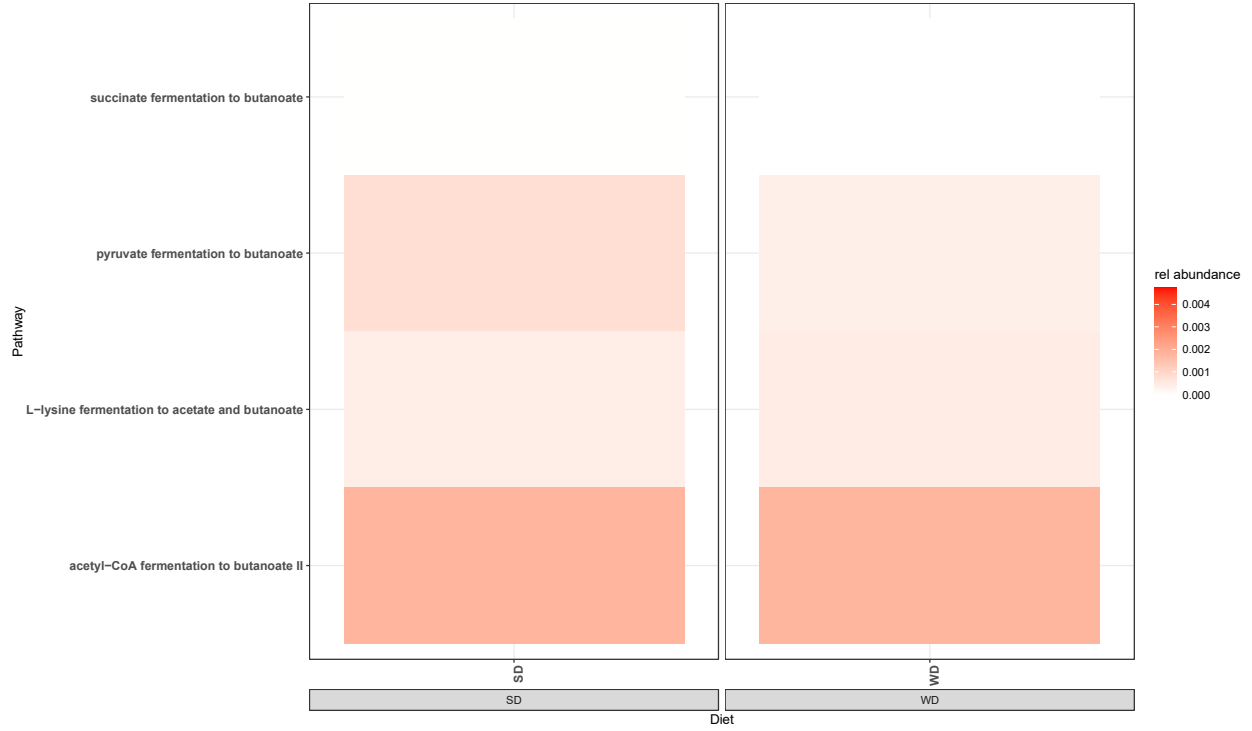

Supplement: NIHMS1770970-supplement-FigS4.pdf [file NIHMS1770970-supplement-FigS4.pdf]

A.

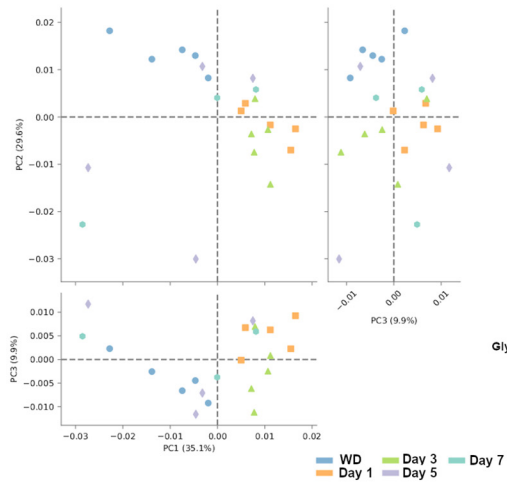

B.

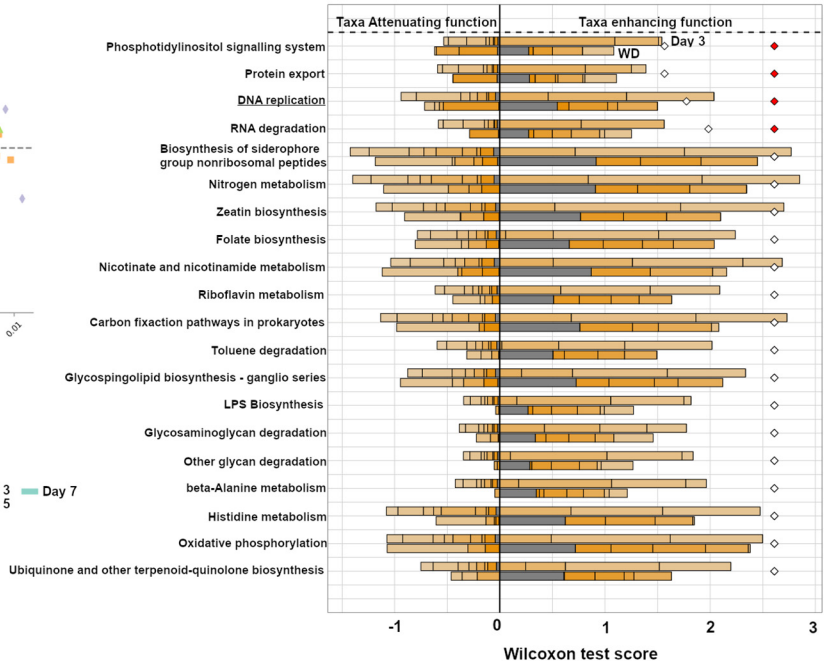

Supplement: NIHMS1770970-supplement-FigS6.pdf [file NIHMS1770970-supplement-FigS6.pdf]
